# Supplementary material
Source: PubMed Central journal article supplement (PMC130550)

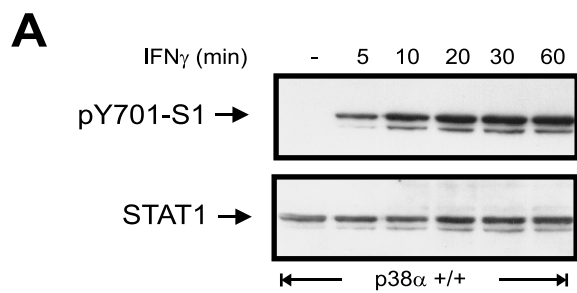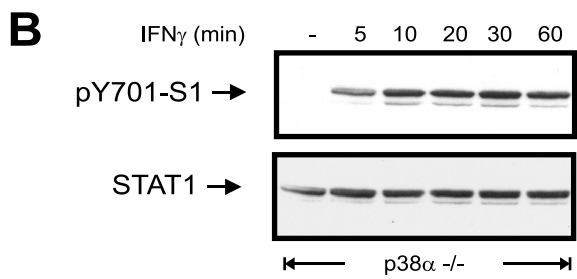

Supplement: pnas_192264999_4.pdf [file pnas_192264999_4.pdf]

**A**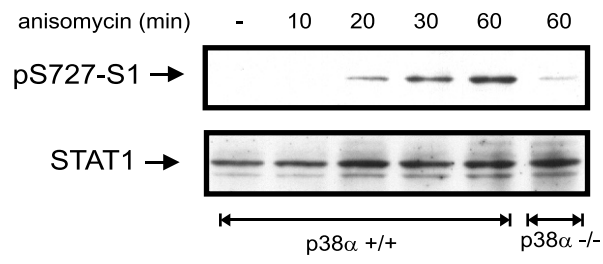**B**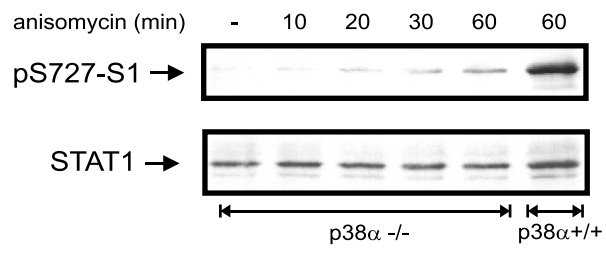

Supplement: pnas_192264999_5.pdf [file pnas_192264999_5.pdf]

Stimulation: - An IFN $\gamma$  IFN $\gamma$  An IFN $\gamma$  An IFN $\gamma$

S1 AB: - - - + - +

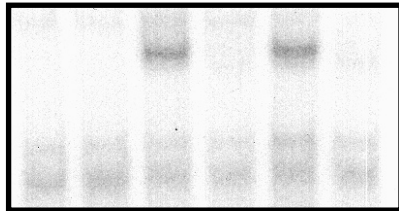

← (STAT1)<sub>2</sub>

← NS

Supplement: pnas_192264999_6.pdf [file pnas_192264999_6.pdf]
